# Supplementary material for: Functional Characterization of Aluminum (Al)-Responsive Membrane-Bound NAC Transcription Factors in Soybean Roots
Source: MDPI journal article supplement (doi:10.3390/ijms222312854), 2021-11-27
Supplement: s1 [file s1]

**Table S1.** Gene loci, exon and intron number, length of ORF, and protein size were extracted from the Phytozome website (<http://www.phytozome.net>).

| Gene name      | Gene Loci             | Gene Bank accession no. | Exon/ Intron number | Length of ORF (bp) | Number of amino acids | Molecular weight (KDa) | Theoretical pI |
|----------------|-----------------------|-------------------------|---------------------|--------------------|-----------------------|------------------------|----------------|
| <i>GmNTL1</i>  | Glyma.02G<br>222300   | NP_00127628<br>7.1      | 6/5                 | 1767               | 589                   | 65.6                   | 4.88           |
| <i>GmNTL2</i>  | Glyma.02G<br>240500   | XP_00351836<br>2.1      | 6/5                 | 1929               | 643                   | 73.3                   | 5.26           |
| <i>GmNTL3</i>  | Glyma.04G<br>226700   | NP_00127621<br>1.2      | 6/5                 | 1809               | 603                   | 67.6                   | 5.25           |
| <i>GmNTL4</i>  | Glyma.06G<br>138100   | XP_00352677<br>1.1      | 6/5                 | 1794               | 598                   | 67.1                   | 5.72           |
| <i>GmNTL5</i>  | Glyma.07G<br>047900   | XP_00352986<br>5.1      | 6/5                 | 1491               | 497                   | 56.7                   | 5.77           |
| <i>GmNTL6</i>  | Glyma.10G<br>197600.1 | XP_00355710<br>0.3      | 7/6                 | 1344               | 448                   | 49.7                   | 4.50           |
| <i>GmNTL7</i>  | Glyma.10G<br>219600   | NP_00127437<br>5.1      | 5/4                 | 1680               | 560                   | 62.8                   | 4.70           |
| <i>GmNTL8</i>  | Glyma.11G<br>212400.1 | XP_01461969<br>0.1      | 6/5                 | 2016               | 672                   | 75.9                   | 5.40           |
| <i>GmNTL9</i>  | Glyma.12G<br>186900.1 | KAG4981079              | 8/7                 | 1479               | 493                   | 56.1                   | 9.14           |
| <i>GmNTL10</i> | Glyma.13G<br>314600   | KAH1104308              | 4/3                 | 1113               | 371                   | 42.0                   | 7.10           |
| <i>GmNTL11</i> | Glyma.14G<br>189300   | XP_00659641<br>2.1      | 6/5                 | 1770               | 590                   | 65.8                   | 4.88           |
| <i>GmNTL12</i> | Glyma.14G<br>210000   | XP_00354435<br>2.1      | 6/5                 | 1932               | 644                   | 73.4                   | 5.08           |
| <i>GmNTL13</i> | Glyma.18G<br>043900   | XP_00355288<br>8.2      | 6/5                 | 2034               | 678                   | 76.5                   | 5.52           |
| <i>GmNTL14</i> | Glyma.20G<br>172100   | XP_00355618<br>0.1      | 5/4                 | 1647               | 549                   | 61.7                   | 4.75           |
| <i>GmNTL15</i> | Glyma.20G<br>192300   | XP_00355630<br>2.1      | 6/5                 | 1812               | 604                   | 66.9                   | 4.82           |

**Table S2.** Primers used for vector constructions and qRT-PCR verification.

| Names            | Gene Loci         | Forward Primers        | Reverse Primers        |
|------------------|-------------------|------------------------|------------------------|
| <i>GmNTL1</i>    | Glyma.02G222300   | GTCGTCGAGTGTTACCCACA   | CGTAGCTCGGTTCAACCTGT   |
| <i>GmNTL2</i>    | Glyma.02G240500   | TTCAGATTCCACCCTACAGACG | GATTTCCCTGGCAAGTCCC    |
| <i>GmNTL3</i>    | Glyma.04G226700   | ATGGGTATTGGAAGGCGACG   | TGTGGAGTAATAGGCAGCCAC  |
| <i>GmNTL4</i>    | Glyma.06G138100   | GCCGTTAGGGTTCCGTTTC    | GCTCCTTCAAAGTGGGACGATA |
| <i>GmNTL5</i>    | Glyma.07G047900   | GGGAATTGAGGCACCAACCT   | ATCTTCCAGCCCAATGCCAG   |
| <i>GmNTL6</i>    | Glyma.10G197600.1 | GATTGCTCTTGGACTTCA     | AGTAATGTCTGTTATGCTGAT  |
| <i>GmNTL7</i>    | Glyma.10G219600   | CCCAAGTGCATCAGAAGGCT   | GCAGTGTCTTTACCTGCTGC   |
| <i>GmNTL8</i>    | Glyma.11G212400.1 | CAATATGTGCGGAGGAAG     | GTGATGATGAGTAGTTGGATT  |
| <i>GmNTL9</i>    | Glyma.12G186900.1 | TTCGAGGGAGGCTCAGATGT   | TGGCTGGTAAATCCCAAGGC   |
| <i>GmNTL10</i>   | Glyma.13G314600   | TTCTGCCCTACCGATGAGGA   | TTTCGCTCTTTGCCAGTTGC   |
| <i>GmNTL11</i>   | Glyma.14G189300   | GCCGTTAGGGTTCCGTTTC    | AAGGCTCCCATTTGCAGACA   |
| <i>GmNTL12</i>   | Glyma.14G210000   | CATGGATATTTGCTCACCTGC  | AGGCTTGTGCCATTTTCAGC   |
| <i>GmNTL13</i>   | Glyma.18G043900   | ATCAATGGTGGGACAAGGGAT  | TCAGCTCGGAAATGCCAACT   |
| <i>GmNTL14</i>   | Glyma.20G172100   | CCCGGAGAGCACTTTATTTTGG | ACCGGTTCTCGATCCATAGTTG |
| <i>GmNTL15</i>   | Glyma.20G192300   | AGAAGGAGTGGGATGTTGAGG  | ATGTCAAGGTCGTTGGTTTCA  |
| <i>GmEF1-α</i>   | Glyma.17G186600   | TGCAAAGGAGGCTGCTAACT   | CAGCATCACCGTTCTTCAA    |
| <i>AtEF-α</i>    | At5G60390         | GTCGATTCTGGAAAGTCGACC  | AATGTCAATGGTGATACCACGC |
| <i>GOLS4</i>     | At1g60470         | GAAAACATGGAGCCACTCGC   | GTGGTGTGATCTCCAGGGTC   |
| <i>At2g33160</i> | At2g33160         | TTGCGTTTACAAAGGCGTGG   | ATCCACCGCCAGTAACAGTG   |
| <i>ALMT12</i>    | At4g17970         | CGGCAAAGTCCTTCGAGCTA   | GACAGATTCCGCAACCAACG   |
| <i>XTH33</i>     | At1g10550         | GTGACACGCCTCACAGATCA   | ACCACAACACCAGAGGCAAA   |
| <i>PME59</i>     | At5g51490         | CCGGCCTTGGATGAAGTTCT   | AAGTGAAGGGTATGCCGGTG   |
| <i>CSLB5</i>     | At4g15290         | TTGGTGAATCTTGCCGCTCT   | ACAAACATTAGCCTAGGGTCGG |
| <i>PMDH2</i>     | At5g09660         | AGCTCATCTCACTCCTCAGGT  | AGCGAATGTCAAGTTCATGGT  |
| --               | At2g43880         | TGGACGAGCCTCTGGAGTTA   | GCACAAGCACATTGATAAGCGA |
| --               | At2g43890         | ACGGCTGCTTCCAACACAA    | ATTCTACTGCGGCATGGACC   |

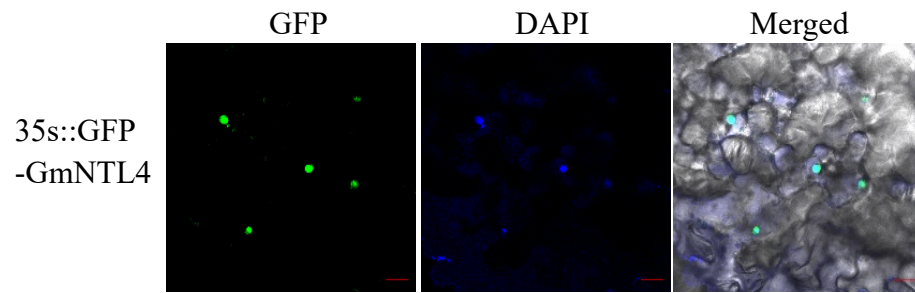

**Figure S1.** Subcellular localization analysis of GmNTL4 in tobacco leaves at 72 h after transformation. Green fluorescence was derived from 35S::GFP-GmNTL4, while blue fluorescence was derived from DAPI, indicating the nucleus.

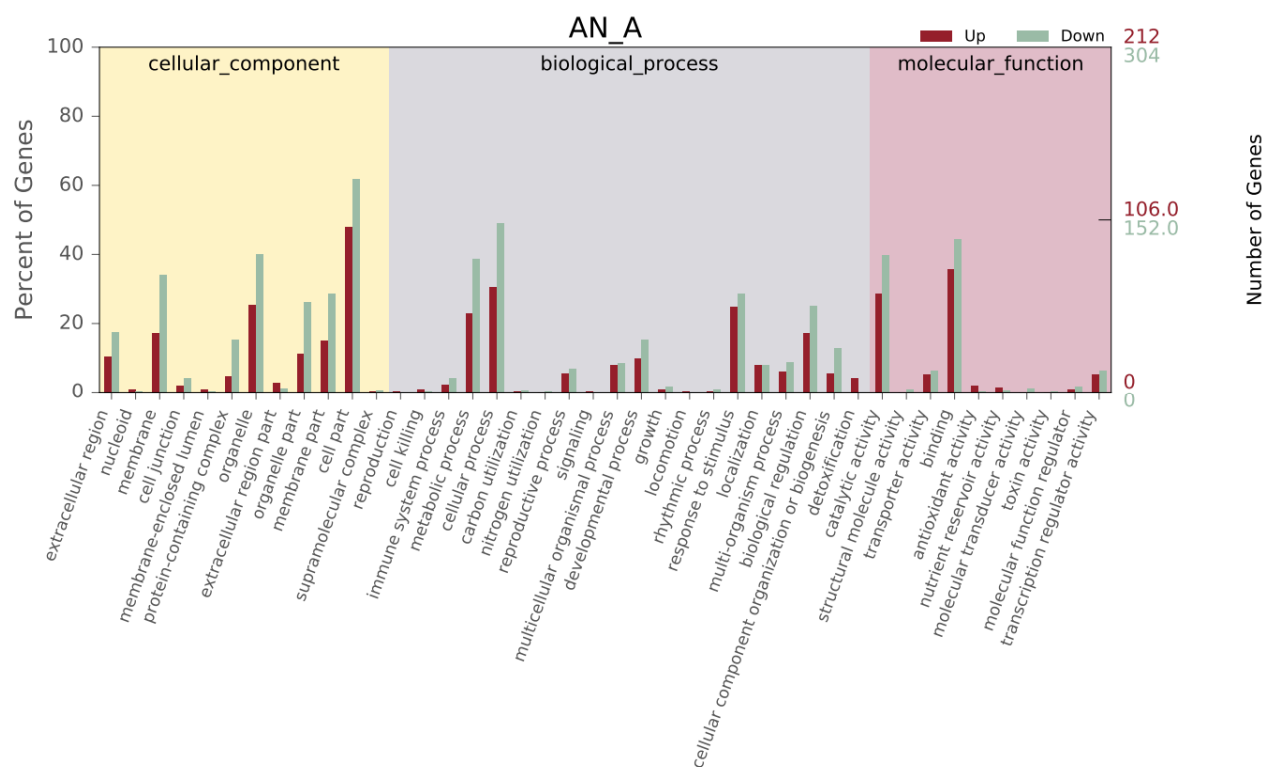

**Figure S2.** Gene Ontology (GO) analysis of differentially expressed genes in *GmNTL4* overexpressing *Arabidopsis*.

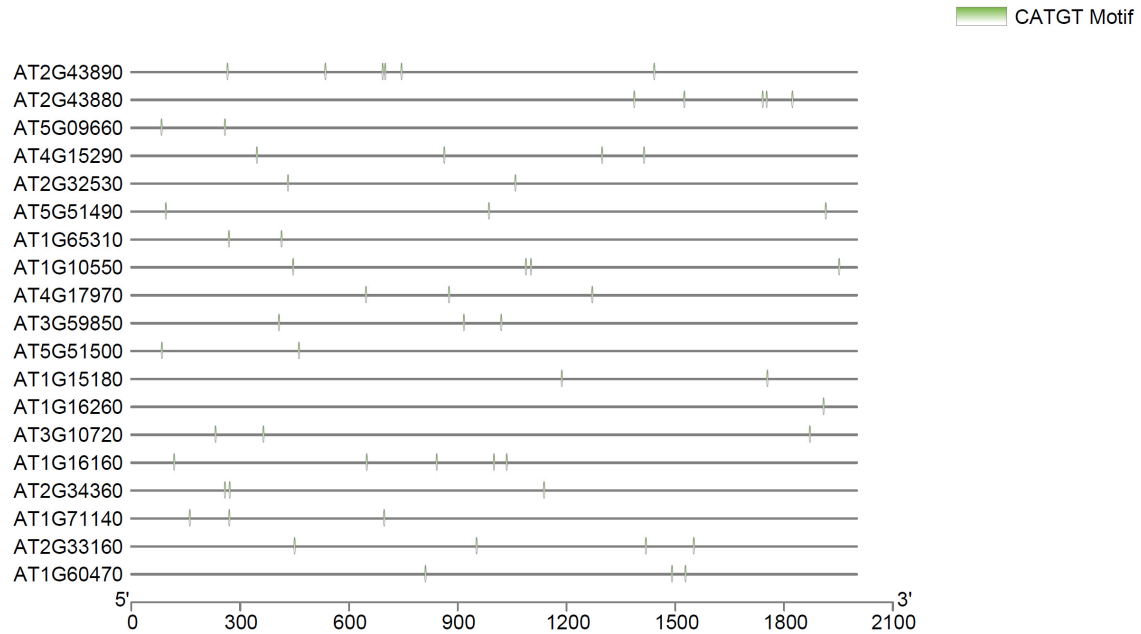

**Figure S3.** Putative NAC binding CATGT motifs found in the promoter regions of the selected genes regulated by GmNTL4 in Arabidopsis. The 2000 bp upstream sequence from the translation initiation site was obtained from the phytozome website (<http://www.phytozome.org/index.php>). The number and location of the promoter CATGT element of the selected genes were analyzed through the SOGO website (<https://sogo.dna.affr.go.jp/cgi-bin/sogo.cgi>). TBtools software was used to visualize the above information data.
